# Supplementary material for: Hydrogen complexes on single atom alloys: classical chemisorption versus coordination chemistry
Source: Royal Society of Chemistry journal article supplement (doi:10.1039/d3cy00609c), 2023-01-01
Supplement: d3cy00609c1.pdf [file d3cy00609c1.pdf]

# Hydrogen Complexes on Single Atom Alloys: Classical Chemisorption versus Coordination Chemistry

*Ilaria Barlocco, Giovanni Di Liberto\*, Gianfranco Pacchioni*

Dipartimento di Scienza dei Materiali, Università di Milano - Bicocca,  
via R. Cozzi 55, 20125 Milano, Italy

## Supporting Information

### Section S1: Structural information

**Table S1:** Cell parameter  $a$  and space group of the optimized bulk metals.

| <b>M</b> | <b><math>a / \text{Å}</math></b> | <b>Space group</b> |
|----------|----------------------------------|--------------------|
| Mo       | 3.136                            | 229                |
| Rh       | 3.793                            | 225                |
| Ag       | 4.067                            | 225                |
| Pd       | 3.888                            | 225                |
| Nb       | 3.261                            | 229                |
| Ni       | 3.474                            | 225                |
| Au       | 4.103                            | 225                |
| Ru       | 2.696                            | 194                |

**Table S2:** Cell parameters  $a$ ,  $b$  and  $\gamma$  of the adopted metal slabs.

| <b>M</b>  | <b><math>a / \text{Å}</math></b> | <b><math>b / \text{Å}</math></b> | <b><math>\gamma / ^\circ</math></b> |
|-----------|----------------------------------|----------------------------------|-------------------------------------|
| Mo (110)  | 9.407                            | 8.869                            | 90                                  |
| Rh (111)  | 5.364                            | 5.364                            | 120                                 |
| Ag (111)  | 5.752                            | 5.752                            | 120                                 |
| Pd (111)  | 5.499                            | 5.499                            | 120                                 |
| Nb (110)  | 9.780                            | 9.220                            | 90                                  |
| Ni (111)  | 4.913                            | 4.913                            | 120                                 |
| Au (111)  | 5.802                            | 5.802                            | 120                                 |
| Ru (0001) | 5.393                            | 5.393                            | 120                                 |

### Section S2: Working equations

The adsorption of H adatom and complexes ( $\Delta E$  and  $\Delta G$ , respectively) were calculated according to the following equations, where  $E_{tot}$  is the energy of the catalyst with adsorbed H and  $H_2$ ,  $E_{H_2}$  and  $E_{cat}$  are the energies of the isolated hydrogen molecule and catalyst, respectively. The Gibbs free energy were estimated by including the thermodynamics correction according to the seminal approach of Norskov and co-workers. The entropic contribution of solid-state species was

neglected, the entropy of gas phase H<sub>2</sub> was taken from international tables; at 298 K,  $T\Delta S_H$ , is equal to 0.40 eV. The zero-point energy correction term,  $\Delta E_{ZPE}$ , is often small (less than 0.1 eV). We adopt the value 0.04 eV, following Ref. <sup>1</sup>, which is a representative case of atomic H adsorbed on several metal surfaces.<sup>1-3</sup>

$$\Delta E_H = E_{tot} - E_{H_2} * 0.5 - E_{cat}$$

$$\Delta E_{H_2} = E_{tot} - E_{H_2} - E_{cat}$$

The exchange current,  $\text{Log}(i_0)$  for hydrogen evolution reaction over the different metal surfaces as a function of the calculated hydrogen chemisorption free energy ( $\Delta G_{H^*}$ ) was obtained according to Ref. <sup>1</sup>:

$$\text{for } \Delta G_{H^*} < 0: i_0 = -ek_0 \frac{1}{1 + \exp(-\Delta G_H / k_B T)}$$

$$\text{for } \Delta G_{H^*} > 0: i_0 = -ek_0 \frac{1}{1 + \exp(-\Delta G_H / k_B T)} \exp(-\Delta G_H / k_B T)$$

### Section S3: additional information for H and H<sub>2</sub> adsorption on SAAs

**Table S3:** Unpaired electrons and atomic magnetizations of the dopant metals atom in the SAA system.

| System     | Magnetization / $\mu_B$ | Unpaired electrons |
|------------|-------------------------|--------------------|
| Ti@Ag(111) | 1.10                    | 1                  |
| Fe@Ag(111) | 2.91                    | 3                  |
| Co@Ag(111) | 1.51                    | 2                  |
| W@Ag(111)  | 2.22                    | 2                  |
| Ir@Ag(111) | 0.00                    | 0                  |
| Pt@Ag(111) | 0.00                    | 0                  |
| Ti@Au(111) | 0.00                    | 0                  |
| Fe@Au(111) | 3.00                    | 3                  |
| Co@Au(111) | 1.69                    | 2                  |
| W@Au(111)  | 1.62                    | 2                  |
| Ir@Au(111) | 0.00                    | 0                  |
| Pt@Au(111) | 0.00                    | 0                  |
| Ti@Rh(111) | 0.00                    | 0                  |

|             |      |   |
|-------------|------|---|
| Fe@Rh(111)  | 2.79 | 3 |
| Co@Rh(111)  | 1.32 | 1 |
| W@Rh(111)   | 0.00 | 0 |
| Ir@Rh(111)  | 0.00 | 0 |
| Pt@Rh(111)  | 0.00 | 0 |
| Ti@Pd(111)  | 0.12 | 0 |
| Fe@Pd(111)  | 0.29 | 0 |
| Co@Pd(111)  | 2.18 | 2 |
| W@Pd(111)   | 0.03 | 0 |
| Ir@Pd(111)  | 1.06 | 1 |
| Pt@Pd(111)  | 0.30 | 0 |
| Ti@Ni(111)  | 0.17 | 0 |
| Fe@Ni(111)  | 2.87 | 3 |
| Co@Ni(111)  | 1.74 | 2 |
| W@Ni(111)   | 0.01 | 0 |
| Ir@Ni(111)  | 0.59 | 1 |
| Pt@Ni(111)  | 0.11 | 0 |
| Ti@Ru(0001) | 0.01 | 0 |
| Fe@Ru(0001) | 2.46 | 2 |
| Co@Ru(0001) | 0.16 | 0 |
| W@Ru(0001)  | 0.03 | 0 |
| Ir@Ru(0001) | 0.03 | 0 |
| Pt@Ru(0001) | 0.02 | 0 |
| Ti@Mo(110)  | 0.00 | 0 |
| Fe@Mo(110)  | 2.41 | 2 |



|                   |          |              |             |             |             |                       |              |             |             |
|-------------------|----------|--------------|-------------|-------------|-------------|-----------------------|--------------|-------------|-------------|
| Ag(111)           | H        | 0.36         | //          | 1.90        | 62.3        | 2H*                   | 0.64         | 1.88        | 2.88        |
| <b>Ti@Ag(111)</b> | <b>H</b> | <b>0.05</b>  | <b>1.93</b> | <b>1.96</b> | <b>57.0</b> | <b>H*H*</b>           | <b>-0.05</b> | <b>1.92</b> | <b>2.64</b> |
| Ti@Ag(111)        | H        | -0.06        | 1.85        | 2.03        | 52.3        | H*H*                  | -0.26        | 1.87        | 2.57        |
| <b>Fe@Ag(111)</b> | <b>H</b> | <b>0.02</b>  | <b>1.74</b> | <b>1.97</b> | <b>57.4</b> | <b>H*H*</b>           | <b>0.09</b>  | <b>1.75</b> | <b>2.57</b> |
| Fe@Ag(111)        | H        | -0.06        | 1.70        | 1.99        | 56.8        | H*H*                  | -0.17        | 1.70        | 2.42        |
| <b>Co@Ag(111)</b> | <b>H</b> | <b>0.76</b>  | <b>1.69</b> | <b>1.94</b> | <b>58.6</b> | <b>H*H*</b>           | <b>0.14</b>  | <b>1.73</b> | <b>2.56</b> |
| Co@Ag(111)        | H        | -0.03        | 1.58        | 2.10        | 47.1        | H <sub>2</sub> *      | -0.14        | 1.51        | 1.04        |
| <b>W@Ag(111)</b>  | <b>H</b> | <b>-0.15</b> | <b>1.79</b> | <b>2.21</b> | <b>44.6</b> | <b>H*H*</b>           | <b>-0.43</b> | <b>1.79</b> | <b>2.11</b> |
| W@Ag(111)         | H        | -0.33        | 1.77        | 2.24        | 43.4        | H*H*                  | -0.83        | 1.75        | 2.00        |
| <b>Ir@Ag(111)</b> | <b>T</b> | <b>-0.59</b> | <b>1.57</b> | //          | <b>0.0</b>  | <b>H*H*</b>           | <b>-0.97</b> | <b>1.60</b> | <b>1.90</b> |
| Ir@Ag(111)        | T        | -0.51        | 1.59        | //          | 0.0         | H*H*                  | -0.89        | 1.62        | 1.95        |
| <b>Pt@Ag(111)</b> | <b>H</b> | <b>-0.01</b> | <b>1.62</b> | <b>2.23</b> | <b>44.6</b> | <b>H*H*</b>           | <b>0.04</b>  | <b>1.65</b> | <b>2.34</b> |
| Pt@Ag(111)        | H        | -0.03        | 1.64        | 2.22        | 44.7        | H*H*                  | -0.02        | 1.67        | 2.35        |
| Au(111)           | H        | 0.471        | //          | 1.88        | 64.1        | 2H*                   | 0.859        | 1.87        | 2.90        |
|                   |          |              |             | 1.86        |             |                       |              | 1.91        |             |
|                   |          |              |             | 1.96        |             |                       |              |             |             |
| <b>Ti@Au(111)</b> | <b>H</b> | <b>0.15</b>  | <b>2.00</b> | <b>1.91</b> | <b>57.2</b> | <b>H<sub>2</sub>*</b> | <b>0.18</b>  | <b>2.06</b> | <b>0.78</b> |
| Ti@Au(111)        | H        | 0.08         | 1.88        | 2.01        | 55.2        | H <sub>2</sub> *      | 0.09         | 2.07        | 0.78        |
| <b>Fe@Au(111)</b> | <b>H</b> | <b>0.24</b>  | <b>1.94</b> | <b>1.87</b> | <b>59.9</b> | <b>2H*</b>            | <b>0.42</b>  | <b>1.91</b> | <b>2.76</b> |
| Fe@Au(111)        | H        | 0.30         | 1.77        | 1.96        | 56.7        | 2H*                   | 0.28         | 1.90        | 2.76        |
| <b>Co@Au(111)</b> | <b>H</b> | <b>0.18</b>  | <b>1.90</b> | <b>1.88</b> | <b>57.8</b> | <b>2H*</b>            | <b>0.34</b>  | <b>1.86</b> | <b>2.75</b> |
| Co@Au(111)        | H        | 0.07         | 1.67        | 1.99        | 57.4        | H <sub>2</sub> *      | 0.01         | 1.62        | 0.87        |
| <b>W@Au(111)</b>  | <b>T</b> | <b>-0.12</b> | <b>1.72</b> | //          | <b>0.0</b>  | <b>H*H*</b>           | <b>-0.33</b> | <b>1.74</b> | <b>1.87</b> |
| W@Au(111)         | T        | -0.41        | 1.72        | //          | 0.0         | H*H*                  | -0.70        | 1.73        | 1.85        |
| <b>Ir@Au(111)</b> | <b>T</b> | <b>-0.57</b> | <b>1.57</b> | //          | <b>0.0</b>  | <b>H*H*</b>           | <b>-0.85</b> | <b>1.58</b> | <b>1.70</b> |

|                   |          |              |             |    |            |             |             |             |             |
|-------------------|----------|--------------|-------------|----|------------|-------------|-------------|-------------|-------------|
| Ir@Au(111)        | T        | -0.64        | 1.58        | // | 0.0        | H*H*        | -0.90       | 1.60        | 1.75        |
| <b>Pt@Au(111)</b> | <b>T</b> | <b>-0.10</b> | <b>1.54</b> | // | <b>0.0</b> | <b>H*H*</b> | <b>0.28</b> | <b>1.66</b> | <b>2.29</b> |
| Pt@Au(111)        | T        | -0.11        | 1.56        | // | 0.0        | H*H*        | 0.19        | 1.69        | 2.32        |

\*U parameter employed on the guest transition metal atom:

| TM | $U^{4-6}$ |
|----|-----------|
| Ti | 2.58      |
| Fe | 3.29      |
| Co | 3.42      |
| W  | 2.08      |
| Ir | 2.74      |
| Pt | 2.95      |

**Table S5:** Adsorption energy for H\* and H-H\* species interacting with the guest metal on Au and Ag metal slabs.

|            | H              | H <sub>2</sub> |
|------------|----------------|----------------|
|            | $\Delta E$ /eV | $\Delta E$ /eV |
| Ag(111)    | 0.12           | 0.16           |
| Ti@Ag(111) | -0.30          | -0.75          |
| Fe@Ag(111) | -0.31          | -0.65          |
| Co@Ag(111) | -0.28          | -0.62          |
| W@Ag(111)  | -0.57          | -1.32          |
| Ir@Ag(111) | -0.76          | -1.37          |
| Pt@Ag(111) | -0.28          | -0.50          |
| Au(111)    | 0.23           | 0.38           |
| Ti@Au(111) | -0.17          | -0.39          |
| Fe@Au(111) | 0.05           | -0.21          |
| Co@Au(111) | -0.18          | -0.47          |
| W@Au(111)  | -0.66          | -1.18          |
| Ir@Au(111) | -0.88          | -1.38          |
| Pt@Au(111) | -0.36          | -0.22          |

**Table S6:** Adsorption energy for H\* and H-H\* species interacting with the guest metal on Rh, Pd, Ni, and Ru metal slabs.

|            | H              | H <sub>2</sub> |
|------------|----------------|----------------|
|            | $\Delta E$ /eV | $\Delta E$ /eV |
| Rh(111)    | -0.53          | -1.18          |
| Ti@Rh(111) | -0.79          | -1.55          |
| Fe@Rh(111) | -0.60          | -1.24          |
| Co@Rh(111) | -0.60          | -1.26          |
| W@Rh(111)  | -0.63          | -0.64          |
| Ir@Rh(111) | -0.64          | -1.22          |
| Pt@Rh(111) | -0.47          | -1.02          |
| Pd(111)    | -0.55          | -1.12          |
| Ti@Pd(111) | -0.61          | -1.12          |
| Fe@Pd(111) | -0.68          | -2.47          |
| Co@Pd(111) | -0.51          | -1.01          |
| W@Pd(111)  | -0.53          | -0.95          |
| Ir@Pd(111) | -0.74          | -1.48          |
| Pt@Pd(111) | -0.61          | -1.10          |
| Ni(111)    | -0.63          | -1.30          |
| Ti@Ni(111) | -0.82          | -1.59          |
| Fe@Ni(111) | -0.56          | -1.15          |
| Co@Ni(111) | -0.60          | -1.27          |
| W@Ni(111)  | -0.61          | -1.12          |
| Ir@Ni(111) | -0.55          | -1.12          |
| Pt@Ni(111) | -0.44          | -0.87          |

|             |       |       |
|-------------|-------|-------|
| Ru(0001)    | -0.58 | -1.11 |
| Ti@Ru(0001) | -0.77 | -1.50 |
| Fe@Ru(0001) | -0.55 | -1.17 |
| Co@Ru(0001) | -0.62 | -1.26 |
| W@Ru(0001)  | -0.61 | -1.20 |
| Ir@Ru(0001) | -0.45 | -0.98 |
| Pt@Ru(0001) | -0.29 | -1.20 |

**Table S7:** Adsorption energy for H\* and H-H\* species interacting with the guest metal on Mo and Nb metal slabs.

|            | H              | H <sub>2</sub> |
|------------|----------------|----------------|
|            | $\Delta E$ /eV | $\Delta E$ /eV |
| Mo(110)    | -0.83          | -1.63          |
| Ti@Mo(110) | -1.00          | -0.13          |
| Fe@Mo(110) | -0.61          | -1.47          |
| Co@Mo(110) | -0.86          | -1.50          |
| W@Mo(110)  | -0.89          | -0.02          |
| Ir@Mo(110) | -0.66          | -1.20          |
| Pt@Mo(110) | -1.01          | -1.01          |
| Nb(110)    | -1.43          | -2.47          |
| Ti@Nb(110) | -1.26          | -2.40          |
| Fe@Nb(110) | -0.94          | -1.84          |
| Co@Nb(110) | -0.89          | -1.68          |
| W@Nb(110)  | -1.11          | -2.13          |
| Ir@Nb(110) | -0.80          | -1.39          |



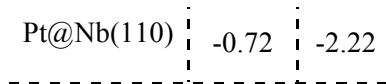

**Table S8:** Calculated desorption temperatures of hydrogen adsorbates on Au and Ag-based SAAs assuming a first-order Redhead model.

|          |    | $\Delta E$ / eV | T / K     |
|----------|----|-----------------|-----------|
| Au metal |    | 0.379           | /         |
| Au       | Ti | -0.388          | 145       |
|          | Fe | -0.206          | 75        |
|          | Co | -0.468          | 170       |
|          | W  | -1.180          | 425       |
|          | Ir | -1.378          | 245       |
|          | Pt | -0.223          | 85<br>145 |
| Ag metal |    | 0.159           | /         |
| Ag       | Ti | -0.745          | 275       |
|          | Fe | -0.653          | 240       |
|          | Co | -0.621          | 230       |
|          | W  | -1.315          | 470       |
|          | Ir | -1.369          | 490       |
|          | Pt | -0.499          | 185       |

**Table S9:** Calculated desorption temperatures of hydrogen adsorbates on Rh, Pd, Ni, and Ru-based SAAs assuming a first-order Redhead model.

|          |    | $\Delta E$ / eV | T / K |
|----------|----|-----------------|-------|
| Rh metal |    | -1.179          | 425   |
| Rh       | Ti | -1.550          | 550   |
|          | Fe | -1.238          | 440   |
|          | Co | -1.260          | 450   |
|          | W  | -0.644          | 235   |
|          | Ir | -1.216          | 435   |
|          | Pt | -1.021          | 370   |
| Pd metal |    | -1.116          | 400   |

|          |    |        |     |
|----------|----|--------|-----|
| Pd       | Ti | -1.118 | 400 |
|          | Fe | -2.466 | 865 |
|          | Co | -1.011 | 365 |
|          | W  | -0.945 | 345 |
|          | Ir | -1.482 | 530 |
|          | Pt | -1.104 | 395 |
| Ni metal |    | -1.302 | 465 |
| Ni       | Ti | -1.588 | 565 |
|          | Fe | -1.146 | 410 |
|          | Co | -1.270 | 455 |
|          | W  | -1.124 | 400 |
|          | Ir | -1.120 | 400 |
|          | Pt | -0.870 | 315 |
| Ru metal |    | -0.58  | 212 |
| Ru       | Ti | -0.77  | 278 |
|          | Fe | -0.55  | 202 |
|          | Co | -0.62  | 225 |
|          | W  | -0.61  | 223 |
|          | Ir | -0.45  | 167 |
|          | Pt | -0.29  | 110 |

**Table S10:** Calculated desorption temperatures of hydrogen adsorbates on Mo and Nb-based SAAs assuming a first-order Redhead model.

|          |    | $\Delta E$ /eV | T / K |
|----------|----|----------------|-------|
| Mo metal |    | -1.63          | 580   |
| Mo       | Ti | -0.13          | 45    |
|          | Fe | -1.47          | 525   |
|          | Co | -1.50          | 535   |
|          | W  | -0.02          | <20   |
|          | Ir | -1.20          | 430   |
|          | Pt | -1.01          | 365   |
| Nb metal |    | -2.47          | 870   |
| Nb       | Ti | -2.40          | 840   |
|          | Fe | -1.84          | 650   |

|  |    |       |     |
|--|----|-------|-----|
|  | Co | -1.68 | 600 |
|  | W  | -2.13 | 750 |
|  | Ir | -1.39 | 500 |
|  | Pt | -2.22 | 785 |

## References

- 1 J. K. Nørskov, T. Bligaard, A. Logadottir, J. R. Kitchin, J. G. Chen, S. Pandalov and U. Stimming, *Journal of The Electrochemical Society*, 2005, **152**, J23.
- 2 J. K. Nørskov, J. Rossmeisl, A. Logadottir, L. Lindqvist, J. R. Kitchin, T. Bligaard and H. Jónsson, *The Journal of Physical Chemistry B*, 2004, **108**, 17886–17892.
- 3 J. K. Nørskov, T. Bligaard, J. Rossmeisl and C. H. Christensen, *Nature Chemistry*, 2009, **1**, 37–46.
- 4 I. V Solovyev, P. H. Dederichs and V. I. Anisimov, *Physical Review B*, 1994, **50**, 16861–16871.
- 5 G. Di Liberto, L. A. Cipriano and G. Pacchioni, *ACS Catalysis*, 2022, **12**, 5846–5856.
- 6 I. Barlocco, L. A. Cipriano, G. Di Liberto and G. Pacchioni, *Advanced Theory and Simulations*, 2022, **2200513**, 2200513.
